# Supplementary material
Source: Springer Nature journal article supplement (https://mijn.bsl.nl/resource/supplementary/13047_2008_87_MOESM6_ESM.pdf/7109568)

LEFT

1m

2m

3m

Back

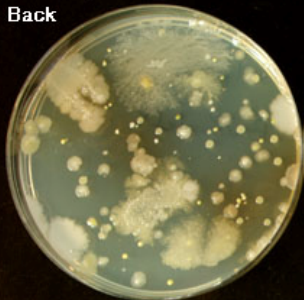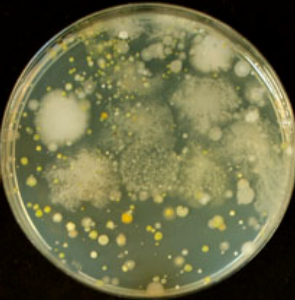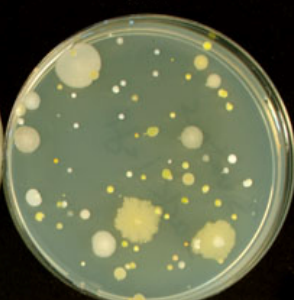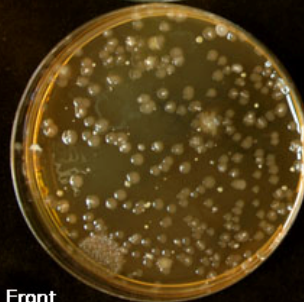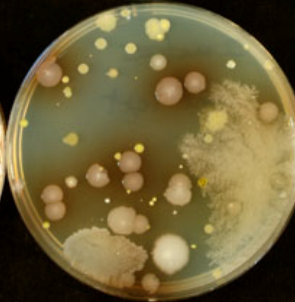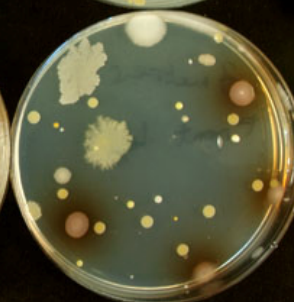

Front

Supplement: MOESM6 [file 7109568]
